# Supplementary material
Source: PubMed Central journal article supplement (PMC3368250)

Figure S

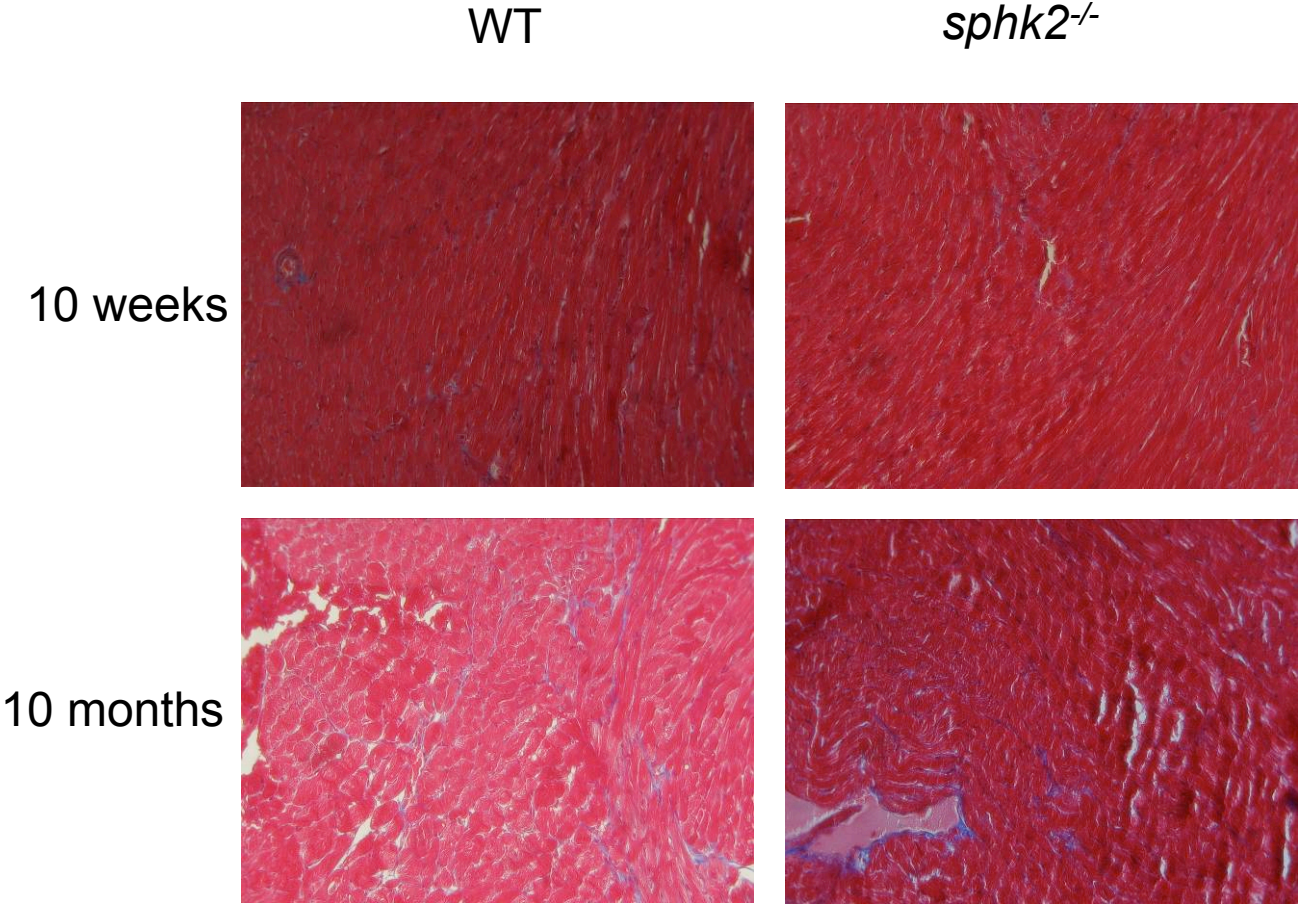

Supplement: NIHMS379406-supplement-supplement_figure.pdf [file NIHMS379406-supplement-supplement_figure.pdf]
